# Supplementary material for: Longitudinal analysis of glymphatic function in amyotrophic lateral sclerosis and primary lateral sclerosis
Source: PubMed Central journal article supplement — Brain. 2024 Sep 6;147(12):4026–32. doi: 10.1093/brain/awae288 (PMC11629681; doi:10.1093/brain/awae288), 2024-09-06
Supplement: awae288_supplementary_data.pdf [file awae288_supplementary_data.pdf]

## Method supplement

Diffusion images were distortion, eddy current, and motion corrected,(Andersson and Sotiropoulos 2016) prior to calculating conventional DTI metrics (fractional anisotropy [FA], mean diffusivity [MD], axial diffusivity [AD], and radial diffusivity [RD]). Four regions were created in MNI standard coordinate space and then transformed to the DTI space of each subject using nearest-neighbour interpolation.(Desikan, Segonne et al. 2006, Avants, Duda et al. 2008, Li, Morgan et al. 2016) Specifically, a cubic region (volume  $3 \times 3 \times 3 \text{ mm}^3$ ) was centred in MNI space at coordinates [27, 52, 50], [32, 52, 50], [63, 52, 50], and [58, 52, 50] in order to locate left association, left projection, right association, and right projection fibers at the level of the lateral ventricle body. A representative image showing placement of the region of interest is included in Supplemental Figure 1. Values of the DTI metric from each region were obtained using *fststats* within FSL.(Smith, Jenkinson et al. 2004) Because no laterality effects were detected a single bilateral DTI-ALPS was used in the analysis.

Statistical analysis of the DTI-ALPS data used R and RStudio, with packages ggplot2, lmerTest, ggsignif and AICcmodavg.(Wilkinson 2011, Kuznetsova, Brockhoff and Christensen 2017, Constantin 2021, Mazerolle 2023)

### *Patient vs control*

The first model compared DTI-ALPS values in all patients vs all controls along with the impact of time, and the interaction between time and disorder status, controlling for age and sex with subject ID included as a random variable, using the following model:

$$Y_{(\text{DTI-ALPS})} = \beta_0 + \beta_1 \text{Timepoint} + \beta_2 \text{Disease Status} + \beta_3 \text{Age} + \beta_4 \text{Sex} + \beta_5 \text{Timepoint} * \text{Disease Status} + \text{random}(\text{Subject ID}) + \varepsilon$$

### *Diagnosis Model*

The above model was repeated, including specific diagnosis instead of disease status, so that ALS, PLS and Controls were examined separately.

$$Y_{(\text{DTI-ALPS})} = \beta_0 + \beta_1 \text{Timepoint} + \beta_2 \text{Diagnosis} + \beta_3 \text{Age} + \beta_4 \text{Sex} + \beta_5 \text{Timepoint} * \text{Diagnosis} + \text{random}(\text{Subject ID}) + \varepsilon$$

### *Symptom Model*

As an exploratory step, a third mixed-effects model including the patients only, was used to test the relationship between the DTI-ALPS index, the ALSFRS score, and the estimated progression rate and an interaction with timepoint for both variables.

$$Y_{(\text{DTI-ALPS})} = \beta_0 + \beta_1 \text{Timepoint} + \beta_2 \text{Diagnosis} + \beta_3 \text{Age} + \beta_4 \text{Sex} + \beta_5 \text{ALSFRS Total Score} + \beta_6 \text{Estimated Progression Rate} + \beta_7 \text{Diagnosis} * \text{Estimated Progression Rate} + \beta_8 \text{Diagnosis} * \text{ALSFRS Score} + \beta_9 \text{Timepoint} * \text{Estimated Progression Rate} + \beta_{10} \text{Timepoint} * \text{ALSFRS Score} + \text{random}(\text{Subject ID}) + \varepsilon$$

### Fazekas Score

Both the Diagnosis Model and the Symptom model were repeated including the modified Fazekas score:

$$Y_{(\text{DTI-ALPS})} = \beta_0 + \beta_1 \text{Timepoint} + \beta_2 \text{Diagnosis} + \beta_3 \text{Age} + \beta_4 \text{Sex} + \beta_5 \text{Fazekas Score} + \beta_6 \text{Timepoint} * \text{Diagnosis} + \text{random}(\text{Subject ID}) + \varepsilon$$

$$Y_{(DTI-ALPS)} = \beta_0 + \beta_1 \text{Timepoint} + \beta_2 \text{Diagnosis} + \beta_3 \text{Age} + \beta_4 \text{Sex} + \beta_5 \text{ALSFRS Total Score} + \beta_6 \text{Estimated Progression Rate} + \beta_7 \text{Fazekas Score} + \beta_8 \text{Diagnosis} * \text{Estimated Progression Rate} + \beta_9 \text{Diagnosis} * \text{ALSFRS Score} + \beta_{10} \text{Timepoint} * \text{Estimated Progression Rate} + \beta_{11} \text{Timepoint} * \text{ALSFRS Score} + \text{random}(\text{Subject ID}) + \varepsilon$$

### Supplemental Figure 1

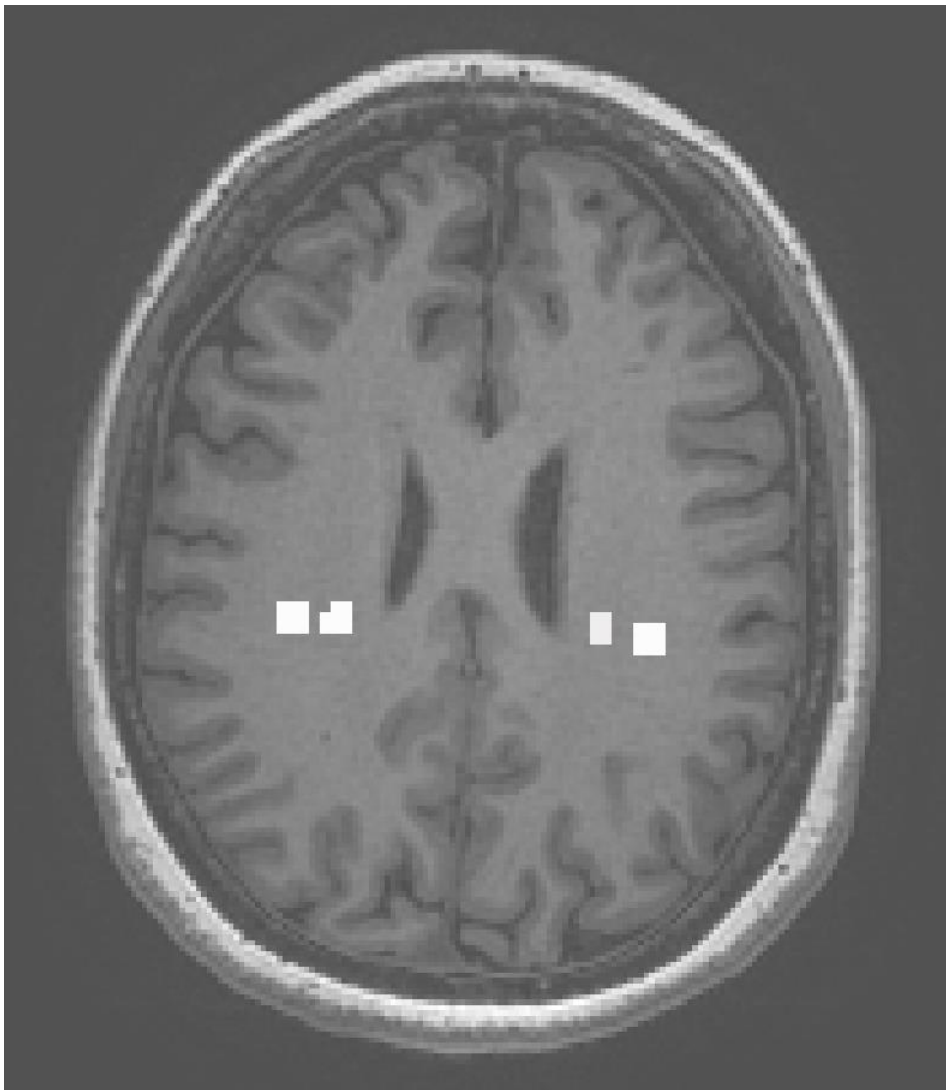

Representative image showing a transverse axial MRI image and placement of regions of interest for the DTI-ALPS analysis.

## References

- Andersson, J. L. R. and S. N. Sotiropoulos (2016). "An integrated approach to correction for off-resonance effects and subject movement in diffusion MR imaging." *Neuroimage* **125**: 1063-1078.
- Avants, B., J. T. Duda, J. Kim, H. Zhang, J. Pluta, J. C. Gee and J. Whyte (2008). "Multivariate analysis of structural and diffusion imaging in traumatic brain injury." *Acad Radiol* **15**(11): 1360-1375.
- Constantin, A. P., I. (2021). ggsignif: R Package for Displaying Significance Brackets for 'ggplot2', PsyArxiv. <https://psyarxiv.com/7awm6>.
- Desikan, R. S., F. Segonne, B. Fischl, B. T. Quinn, B. C. Dickerson, D. Blacker, R. L. Buckner, A. M. Dale, R. P. Maguire, B. T. Hyman, M. S. Albert and R. J. Killiany (2006). "An automated labeling system for subdividing the human cerebral cortex on MRI scans into gyral based regions of interest." *Neuroimage* **31**(3): 968-980.
- Kuznetsova, A., P. B. Brockhoff and R. H. B. Christensen (2017). "lmerTest Package: Tests in Linear Mixed Effects Models." *Journal of Statistical Software* **82**(13): 1 - 26.
- Li, X., P. S. Morgan, J. Ashburner, J. Smith and C. Rorden (2016). "The first step for neuroimaging data analysis: DICOM to NIfTI conversion." *J Neurosci Methods* **264**: 47-56.
- Mazerolle, M. J. (2023). AICcmoavg: Model selection and multimodel inference based on (Q)AIC(c).
- Smith, S. M., M. Jenkinson, M. W. Woolrich, C. F. Beckmann, T. E. Behrens, H. Johansen-Berg, P. R. Bannister, M. De Luca, I. Drobnjak, D. E. Flitney, R. K. Niazy, J. Saunders, J. Vickers, Y. Zhang, N. De Stefano, J. M. Brady and P. M. Matthews (2004). "Advances in functional and structural MR image analysis and implementation as FSL." *Neuroimage* **23 Suppl 1**: S208-219.
- RStudio Team (2020). RStudio: Integrated Development for R. RStudio, PBC, Boston, MA URL <http://www.rstudio.com/>.
- Wickham H (2016). ggplot2: Elegant Graphics for Data Analysis. Springer-Verlag New York. ISBN 978-3-319-24277-4, <https://ggplot2.tidyverse.org>
- Wilkinson, L. (2011). "ggplot2: Elegant Graphics for Data Analysis by WICKHAM, H." *Biometrics* **67**(2): 678-679.
